# Supplementary material
Source: PubMed Central journal article supplement (PMC5980728)

## Data supplement

# Time to treatment is an independent prognostic factor in aggressive non-Hodgkin lymphomas

**Authors:** Adam J Olszewski, MD <sup>1,2</sup>,  
Thomas Ollila, MD <sup>1,2</sup>,  
John L Reagan, MD <sup>1,2</sup>,

### Affiliations

<sup>1</sup> Department of Medicine, Alpert Medical School of Brown University, Providence, RI

<sup>2</sup> Division of Hematology and Oncology, Rhode Island Hospital, Providence, RI

**Table S1.** Characteristics of **Burkitt lymphoma** patients, stratified by time from diagnosis to start of chemotherapy.

|                                             | All patients | Time from diagnosis to chemotherapy |            |            |            |
|---------------------------------------------|--------------|-------------------------------------|------------|------------|------------|
|                                             |              | 0-7 days                            | 8-14 days  | 15-30 days | >30 days   |
| <i>N</i>                                    | 4,552        | 1,502                               | 1,131      | 1,237      | 682        |
| Age, median (IQR)                           | 54 (38-66)   | 52 (35-64)                          | 54 (38-67) | 54 (39-66) | 57 (42-69) |
| Sex, <i>N</i> (%)                           |              |                                     |            |            |            |
| Male                                        | 3,136 (69)   | 1,050 (70)                          | 758 (67)   | 860 (70)   | 468 (69)   |
| Female                                      | 1,416 (31)   | 452 (30)                            | 373 (33)   | 377 (31)   | 214 (31)   |
| Race/ethnicity, <i>N</i> (%)                |              |                                     |            |            |            |
| White non-Hispanic                          | 3,625 (80)   | 1,204 (80)                          | 910 (81)   | 981 (79)   | 530 (78)   |
| White Hispanic                              | 403 (9)      | 132 (9)                             | 95 (8)     | 109 (9)    | 67 (10)    |
| Black                                       | 265 (6)      | 93 (6)                              | 53 (5)     | 70 (6)     | 49 (7)     |
| Asian/Other                                 | 215 (5)      | 64 (4)                              | 57 (5)     | 64 (5)     | 30 (4)     |
| Unrecorded                                  | 44 (1)       | 9 (1)                               | 16 (1)     | 13 (1)     | 6 (1)      |
| Stage, <i>N</i> (%)                         |              |                                     |            |            |            |
| 1                                           | 822 (18)     | 148 (10)                            | 189 (17)   | 302 (24)   | 183 (27)   |
| 2                                           | 701 (15)     | 154 (10)                            | 174 (15)   | 223 (18)   | 150 (22)   |
| 3                                           | 519 (11)     | 153 (10)                            | 141 (13)   | 139 (11)   | 86 (13)    |
| 4                                           | 2,424 (53)   | 1,021 (68)                          | 610 (54)   | 548 (44)   | 245 (36)   |
| Unrecorded                                  | 86 (2)       | 26 (2)                              | 17 (2)     | 25 (2)     | 18 (3)     |
| B symptoms, <i>N</i> (%)                    |              |                                     |            |            |            |
| Absent                                      | 2,501 (55)   | 709 (47)                            | 631 (56)   | 757 (61)   | 404 (59)   |
| Present                                     | 1,523 (34)   | 630 (42)                            | 386 (34)   | 344 (28)   | 163 (24)   |
| Unrecorded                                  | 528 (12)     | 163 (11)                            | 114 (10)   | 136 (11)   | 115 (17)   |
| Primary site, <i>N</i> (%) <sup>a</sup>     |              |                                     |            |            |            |
| Nodal                                       | 3,229 (71)   | 1,157 (77)                          | 835 (74)   | 813 (66)   | 424 (62)   |
| Extranodal high risk                        | 828 (18)     | 219 (15)                            | 185 (16)   | 248 (20)   | 176 (26)   |
| Extranodal, other                           | 495 (11)     | 126 (8)                             | 111 (10)   | 176 (14)   | 82 (12)    |
| Comorbidity index, <i>N</i> (%)             |              |                                     |            |            |            |
| 0                                           | 3,607 (79)   | 1,181 (79)                          | 901 (80)   | 987 (80)   | 538 (79)   |
| 1                                           | 693 (15)     | 240 (16)                            | 167 (15)   | 186 (15)   | 100 (15)   |
| 2                                           | 157 (3)      | 53 (4)                              | 44 (4)     | 36 (3)     | 24 (4)     |
| ≥3                                          | 95 (2)       | 28 (2)                              | 19 (2)     | 28 (2)     | 20 (3)     |
| Prognostic index, <i>N</i> (%) <sup>b</sup> |              |                                     |            |            |            |
| Low                                         | 967 (21)     | 222 (15)                            | 226 (20)   | 333 (27)   | 186 (27)   |
| Low-Intermediate                            | 1,150 (25)   | 368 (25)                            | 295 (26)   | 300 (24)   | 187 (27)   |
| High-Intermediate                           | 1,072 (24)   | 436 (29)                            | 245 (22)   | 274 (22)   | 117 (17)   |
| High                                        | 1,363 (30)   | 476 (32)                            | 365 (32)   | 330 (27)   | 192 (28)   |

<sup>a</sup> High-risk sites included central nervous system, lung, liver, pancreas, gastrointestinal tract, and bone marrow

<sup>b</sup> Burkitt lymphoma-specific, population-based prognostic index according to Castillo et al., Cancer. 2013;119(20):3672-3679.

**Table S2.** Characteristics of mantle cell lymphoma patients, stratified by time from diagnosis to start of chemotherapy.

|                                         | All patients | Time from diagnosis to chemotherapy |            |            |            |
|-----------------------------------------|--------------|-------------------------------------|------------|------------|------------|
|                                         |              | 0-7 days                            | 8-14 days  | 15-30 days | >30 days   |
| <i>N</i>                                | 11,723       | 1,431                               | 1,578      | 3,602      | 5,112      |
| Age, median (IQR)                       | 65 (58-73)   | 65 (58-74)                          | 66 (58-74) | 65 (58-74) | 65 (57-73) |
| Sex, <i>N</i> (%)                       |              |                                     |            |            |            |
| Male                                    | 8,599 (73)   | 1,058 (74)                          | 1,156 (73) | 2,683 (75) | 3,702 (72) |
| Female                                  | 3,124 (27)   | 373 (26)                            | 422 (27)   | 919 (26)   | 1,410 (28) |
| Race / ethnicity, <i>N</i> (%)          |              |                                     |            |            |            |
| White non-Hispanic                      | 10,405 (89)  | 1,232 (86)                          | 1,419 (90) | 3,261 (91) | 4,493 (88) |
| White Hispanic                          | 518 (4)      | 95 (7)                              | 66 (4)     | 136 (4)    | 221 (4)    |
| Black                                   | 482 (4)      | 70 (5)                              | 55 (4)     | 116 (3)    | 241 (5)    |
| Asian/Other                             | 229 (2)      | 22 (2)                              | 31 (2)     | 62 (2)     | 114 (2)    |
| Unrecorded                              | 89 (1)       | 12 (1)                              | 7 (0)      | 27 (1)     | 43 (1)     |
| Ann Arbor stage, <i>N</i> (%)           |              |                                     |            |            |            |
| 1                                       | 678 (6)      | 51 (4)                              | 68 (4)     | 191 (5)    | 368 (7)    |
| 2                                       | 780 (7)      | 64 (5)                              | 84 (5)     | 255 (7)    | 377 (7)    |
| 3                                       | 1,648 (14)   | 168 (12)                            | 203 (13)   | 540 (15)   | 737 (14)   |
| 4                                       | 8,455 (72)   | 1,116 (78)                          | 1,205 (76) | 2,566 (71) | 3,568 (70) |
| Unrecorded                              | 162 (1)      | 32 (2)                              | 18 (1)     | 50 (1)     | 62 (1)     |
| B symptoms, <i>N</i> (%)                |              |                                     |            |            |            |
| Absent                                  | 6,929 (59)   | 651 (46)                            | 800 (51)   | 2,075 (58) | 3,403 (67) |
| Present                                 | 3,479 (30)   | 622 (44)                            | 623 (40)   | 1,112 (31) | 1,122 (22) |
| Unrecorded                              | 1,315 (11)   | 158 (11)                            | 155 (10)   | 415 (12)   | 587 (12)   |
| Primary site, <i>N</i> (%) <sup>a</sup> |              |                                     |            |            |            |
| Nodal                                   | 9,873 (84)   | 1,230 (86)                          | 1,371 (87) | 3,081 (86) | 4,191 (82) |
| Extranodal high risk                    | 1,023 (9)    | 155 (11)                            | 136 (9)    | 269 (8)    | 463 (9)    |
| Extranodal, other                       | 827 (7)      | 46 (3)                              | 71 (5)     | 252 (7)    | 458 (9)    |
| Comorbidity index, <i>N</i> (%)         |              |                                     |            |            |            |
| 0                                       | 9,281 (79)   | 1,040 (73)                          | 1,210 (77) | 2,904 (81) | 4,127 (81) |
| 1                                       | 1,853 (16)   | 275 (19)                            | 273 (17)   | 522 (15)   | 783 (15)   |
| 2                                       | 438 (4)      | 81 (6)                              | 69 (4)     | 130 (4)    | 158 (3)    |
| ≥3                                      | 151 (1)      | 35 (2)                              | 26 (2)     | 46 (1)     | 44 (1)     |
| IPI, <i>N</i> (%)                       |              |                                     |            |            |            |
| Low                                     | 300 (18)     | 16 (9)                              | 18 (8)     | 96 (19)    | 170 (24)   |
| Low-Intermediate                        | 499 (31)     | 46 (26)                             | 64 (27)    | 144 (29)   | 245 (34)   |
| High-Intermediate                       | 434 (27)     | 44 (25)                             | 64 (27)    | 140 (28)   | 186 (26)   |
| High                                    | 405 (25)     | 71 (40)                             | 91 (38)    | 121 (24)   | 122 (17)   |

<sup>a</sup> High-risk sites included central nervous system, lung, liver, pancreas, gastrointestinal tract, and bone marrow  
IPI: International prognostic index

**Table S3.** Characteristics of **peripheral T-cell lymphoma** patients, stratified by time from diagnosis to start of chemotherapy.

|                                         | All patients | Time from diagnosis to chemotherapy |            |            |            |
|-----------------------------------------|--------------|-------------------------------------|------------|------------|------------|
|                                         |              | 0-7 days                            | 8-14 days  | 15-30 days | >30 days   |
| <i>N</i>                                | 9,809        | 1,402                               | 1,826      | 3,130      | 3,451      |
| Age, median (IQR)                       | 61 (49-71)   | 59 (44-70)                          | 60 (48-71) | 61 (49-71) | 62 (51-71) |
| Sex, <i>N</i> (%)                       |              |                                     |            |            |            |
| Male                                    | 5,939 (61)   | 881 (63)                            | 1,122 (61) | 1,850 (59) | 2,086 (60) |
| Female                                  | 3,870 (40)   | 521 (37)                            | 704 (39)   | 1,280 (41) | 1,365 (40) |
| Race / ethnicity, <i>N</i> (%)          |              |                                     |            |            |            |
| White non-Hispanic                      | 7,274 (74)   | 1,009 (72)                          | 1,323 (73) | 2,416 (77) | 2,526 (73) |
| White Hispanic                          | 593 (6)      | 99 (7)                              | 122 (7)    | 159 (5)    | 213 (6)    |
| Black                                   | 1,404 (14)   | 209 (15)                            | 266 (15)   | 395 (13)   | 534 (16)   |
| Asian/Other                             | 430 (4)      | 68 (5)                              | 93 (5)     | 130 (4)    | 139 (4)    |
| Unrecorded                              | 108 (1)      | 17 (1)                              | 22 (1)     | 30 (1)     | 39 (1)     |
| Ann Arbor stage, <i>N</i> (%)           |              |                                     |            |            |            |
| 1                                       | 1,311 (13)   | 95 (7)                              | 155 (9)    | 398 (13)   | 663 (19)   |
| 2                                       | 1,451 (15)   | 147 (11)                            | 196 (11)   | 486 (16)   | 622 (18)   |
| 3                                       | 2,667 (27)   | 337 (24)                            | 518 (28)   | 916 (29)   | 896 (26)   |
| 4                                       | 4,225 (43)   | 802 (57)                            | 929 (51)   | 1,288 (41) | 1,206 (35) |
| Unrecorded                              | 155 (2)      | 21 (2)                              | 28 (2)     | 42 (1)     | 64 (2)     |
| B symptoms, <i>N</i> (%)                |              |                                     |            |            |            |
| Absent                                  | 4,770 (49)   | 522 (37)                            | 698 (38)   | 1,500 (48) | 2,050 (59) |
| Present                                 | 4,136 (42)   | 757 (54)                            | 977 (54)   | 1,342 (43) | 1,060 (31) |
| Unrecorded                              | 903 (9)      | 123 (9)                             | 151 (8)    | 288 (9)    | 341 (10)   |
| Primary site, <i>N</i> (%) <sup>a</sup> |              |                                     |            |            |            |
| Nodal                                   | 8,138 (83)   | 1,217 (87)                          | 1,600 (88) | 2,652 (85) | 2,669 (77) |
| Extranodal, high risk                   | 689 (7)      | 112 (8)                             | 119 (7)    | 188 (6)    | 270 (8)    |
| Extranodal, other                       | 982 (10)     | 73 (5)                              | 107 (6)    | 290 (9)    | 512 (15)   |
| Comorbidity index, <i>N</i> (%)         |              |                                     |            |            |            |
| 0                                       | 7,735 (79)   | 1,069 (76)                          | 1,408 (77) | 2,498 (80) | 2,760 (80) |
| 1                                       | 1,574 (16)   | 252 (18)                            | 317 (17)   | 494 (16)   | 511 (15)   |
| 2                                       | 370 (4)      | 58 (4)                              | 66 (4)     | 109 (4)    | 137 (4)    |
| ≥3                                      | 130 (1)      | 23 (2)                              | 35 (2)     | 29 (1)     | 43 (1)     |
| IPI, <i>N</i> (%)                       |              |                                     |            |            |            |
| Low                                     | 442 (29)     | 30 (14)                             | 57 (23)    | 152 (30)   | 203 (37)   |
| Low-Intermediate                        | 384 (25)     | 47 (22)                             | 55 (22)    | 124 (25)   | 158 (29)   |
| High-Intermediate                       | 328 (22)     | 65 (30)                             | 55 (22)    | 105 (21)   | 103 (19)   |
| High                                    | 364 (24)     | 74 (34)                             | 84 (34)    | 119 (24)   | 87 (16)    |
| Histology, <i>N</i> (%)                 |              |                                     |            |            |            |
| PTCL, NOS                               | 4,660 (48)   | 646 (46)                            | 779 (43)   | 1,419 (45) | 1,816 (53) |
| Angioimmunoblastic                      | 1,930 (20)   | 254 (18)                            | 413 (23)   | 663 (21)   | 600 (17)   |
| Anaplastic large cell                   | 3,219 (33)   | 502 (36)                            | 634 (35)   | 1,048 (34) | 1,035 (30) |

<sup>a</sup> High-risk sites included central nervous system, lung, liver, pancreas, gastrointestinal tract, and bone marrow  
IPI: International prognostic index; PTCL, NOS: peripheral T-cell lymphoma, not otherwise specified

**Table S4.** Overall survival estimates in aggressive non-Hodgkin lymphomas, stratified by time from diagnosis to start of chemotherapy.

| Lymphoma /<br>Time to treatment | Overall survival<br>at 3 years |           | Median<br>survival |         |
|---------------------------------|--------------------------------|-----------|--------------------|---------|
|                                 | %                              | 95%CI     | Years              | 95%CI   |
| <b>DLBCL</b>                    |                                |           |                    |         |
| 0-14 days                       | 58.9                           | 58.4-59.4 | 6.2                | 5.9-6.5 |
| >14 days                        | 72.2                           | 71.9-72.6 | 9.7                | 9.5-9.9 |
| All                             | 67.8                           | 67.5-68.1 | 8.7                | 8.6-8.9 |
| <b>BL</b>                       |                                |           |                    |         |
| 0-14 days                       | 59.0                           | 57.1-60.9 | 8.6                | 7.4-NR  |
| >14 days                        | 68.5                           | 66.3-70.6 | NR                 |         |
| All                             | 63.0                           | 61.6-64.4 | NR                 |         |
| <b>MCL</b>                      |                                |           |                    |         |
| 0-14 days                       | 50.3                           | 48.4-52.2 | 3.0                | 2.8-3.3 |
| >14 days                        | 70.7                           | 69.7-71.7 | 7.2                | 6.9-7.6 |
| All                             | 65.5                           | 64.5-66.4 | 5.9                | 5.6-6.1 |
| <b>PTCL</b>                     |                                |           |                    |         |
| 0-14 days                       | 41.1                           | 39.3-42.8 | 1.2                | 1.1-1.4 |
| >14 days                        | 51.7                           | 50.4-53.0 | 3.4                | 3.1-3.7 |
| All                             | 48.2                           | 47.2-49.2 | 2.6                | 2.4-2.8 |

BL: Burkitt lymphoma; DLBCL: diffuse large B-cell lymphoma; MCL: mantle cell lymphoma; NR: not reached; PTCL: peripheral T-cell lymphoma;

**Table S5.** Sensitivity analysis: survival outcomes of patients with aggressive non-Hodgkin lymphomas who survived at least 4 months from diagnosis, stratified by histology and time from diagnosis to start of chemotherapy.

| <b>Lymphoma,<br/>time to treatment</b> | <b>Models stratified by IPI<sup>a</sup></b> |               | <b>Multivariable models<sup>b</sup></b> |               |
|----------------------------------------|---------------------------------------------|---------------|-----------------------------------------|---------------|
|                                        | <b>HR</b>                                   | <b>95% CI</b> | <b>HR</b>                               | <b>95% CI</b> |
| <b>DLBCL</b>                           |                                             |               |                                         |               |
| 0-7 days                               | 1.26                                        | (1.15-1.37)   | 1.49                                    | (1.44-1.55)   |
| 8-14 days                              | 1.10                                        | (1.02-1.20)   | 1.34                                    | (1.29-1.38)   |
| 15-30 days                             | 1.04                                        | (0.97-1.12)   | 1.12                                    | (1.08-1.15)   |
| >30 days                               | Ref.                                        |               | Ref.                                    |               |
| <b>BL</b>                              |                                             |               |                                         |               |
| 0-7 days                               | 1.41                                        | (1.16-1.71)   | 1.45                                    | (1.19-1.76)   |
| 8-14 days                              | 1.23                                        | (1.01-1.51)   | 1.25                                    | (1.02-1.54)   |
| 15-30 days                             | 1.10                                        | (0.90-1.34)   | 1.10                                    | (0.90-1.35)   |
| >30 days                               | Ref.                                        |               | Ref.                                    |               |
| <b>MCL</b>                             |                                             |               |                                         |               |
| 0-7 days                               | 2.02                                        | (1.57-2.59)   | 2.08                                    | (1.89-2.28)   |
| 8-14 days                              | 1.56                                        | (1.24-1.96)   | 1.61                                    | (1.47-1.77)   |
| 15-30 days                             | 1.21                                        | (1.00-1.46)   | 1.24                                    | (1.15-1.34)   |
| >30 days                               | Ref.                                        |               | Ref.                                    |               |
| <b>PTCL</b>                            |                                             |               |                                         |               |
| 0-7 days                               | 1.33                                        | (1.03-1.72)   | 1.51                                    | (1.36-1.68)   |
| 8-14 days                              | 1.25                                        | (0.99-1.59)   | 1.21                                    | (1.10-1.34)   |
| 15-30 days                             | 1.19                                        | (0.97-1.45)   | 1.19                                    | (1.10-1.29)   |
| >30 days                               | Ref.                                        |               | Ref.                                    |               |

<sup>a</sup> IPI for DLBCL, MCL, and PTCL, population-based prognostic index for Burkitt lymphoma

<sup>b</sup> Model adjusting for age, sex, race/ethnicity, stage, presence of B-symptoms, primary site, comorbidity index, and median income in the county of residence

BL: Burkitt lymphoma; CI: confidence interval; DLBCL: diffuse large B-cell lymphoma; HR: hazard ratio; IPI: international prognostic index; MCL: mantle cell lymphoma; OS: overall survival; PTCL: peripheral T-cell lymphoma; Ref.: reference level.

**Figure S1.** Overall survival of patients with aggressive non-Hodgkin lymphomas who had available International Prognostic Index (or population-based prognostic index for Burkitt lymphoma), stratified by time from diagnosis to start of chemotherapy: (A) diffuse large B-cell lymphoma (DLBCL), (B) Burkitt lymphoma (BL), (C) mantle cell lymphoma (MCL), and (D) peripheral T-cell lymphoma (PTCL).

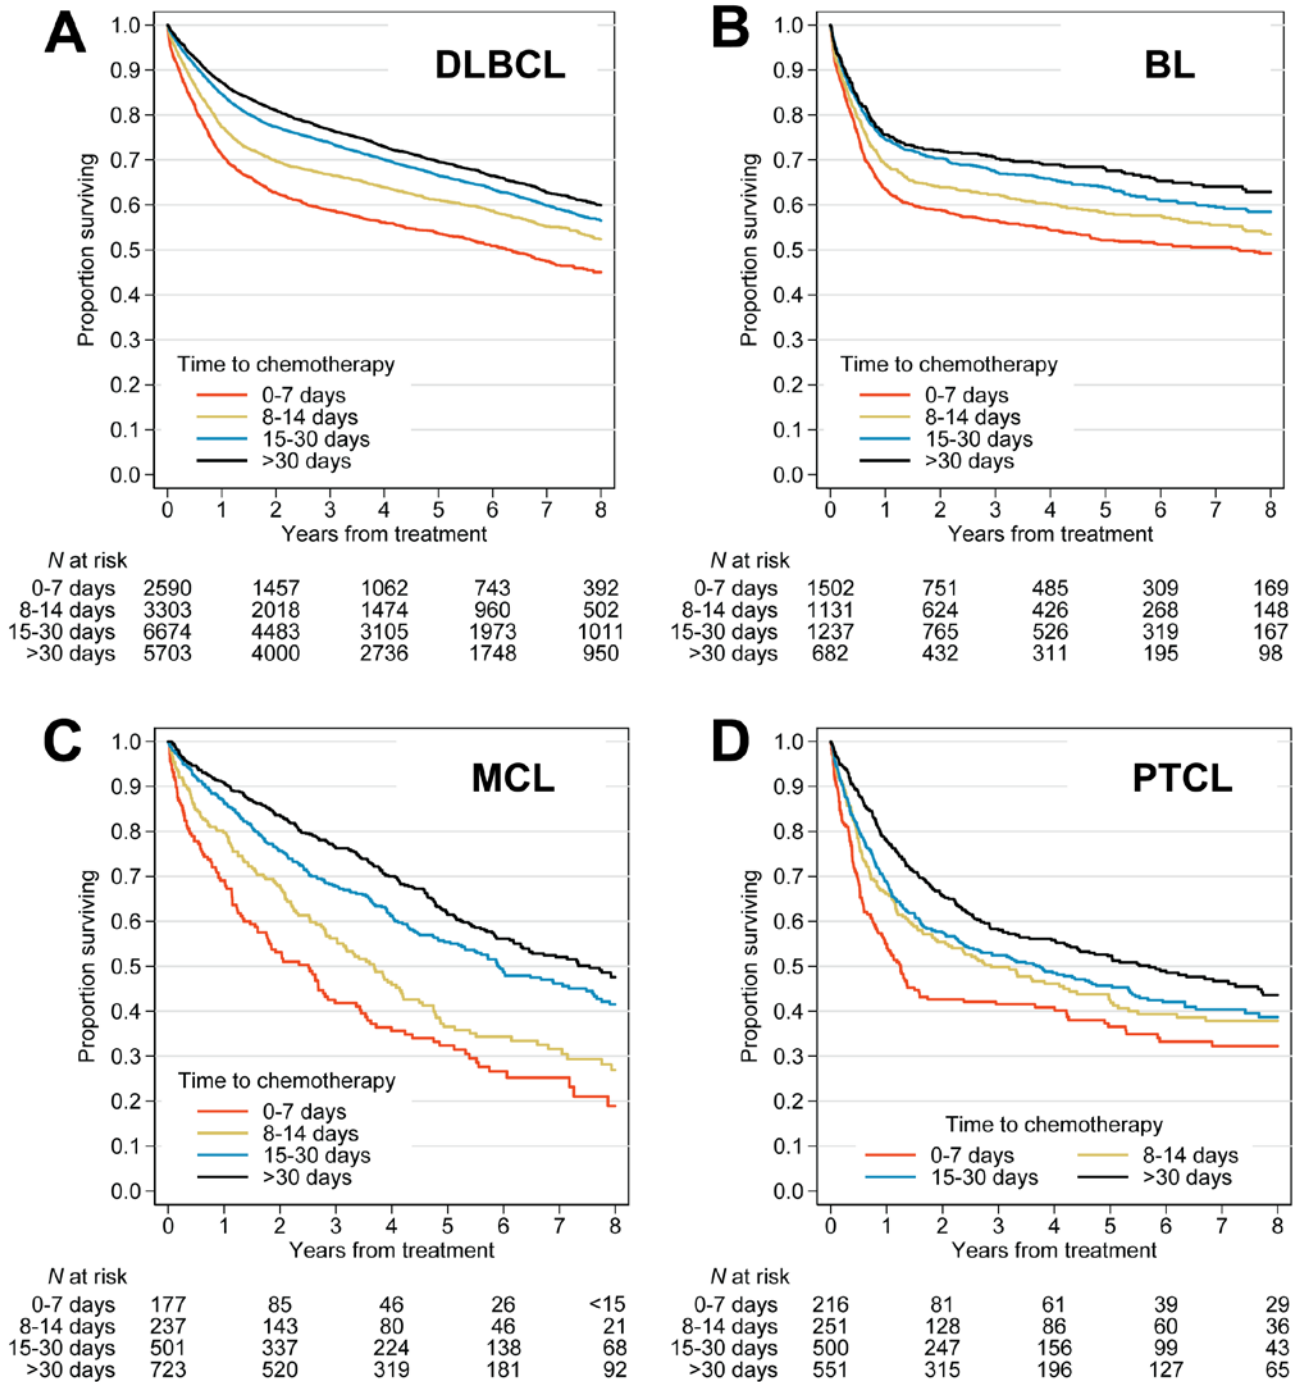

**Figure S2.** Overall survival of patients aggressive non-Hodgkin lymphomas, stratified by time from diagnosis to start of chemotherapy, and by prognostic index grouping: low/low-intermediate (Low/Low-Int) or high-intermediate/high risk (High-Int/High, defined as International Prognostic Index  $\geq 3$ , or Burkitt lymphoma population-based index  $>3$ ): (A) diffuse large B-cell lymphoma (DLBCL), (B) Burkitt lymphoma (BL), (C) mantle cell lymphoma (MCL), and (D) peripheral T-cell lymphoma (PTCL).

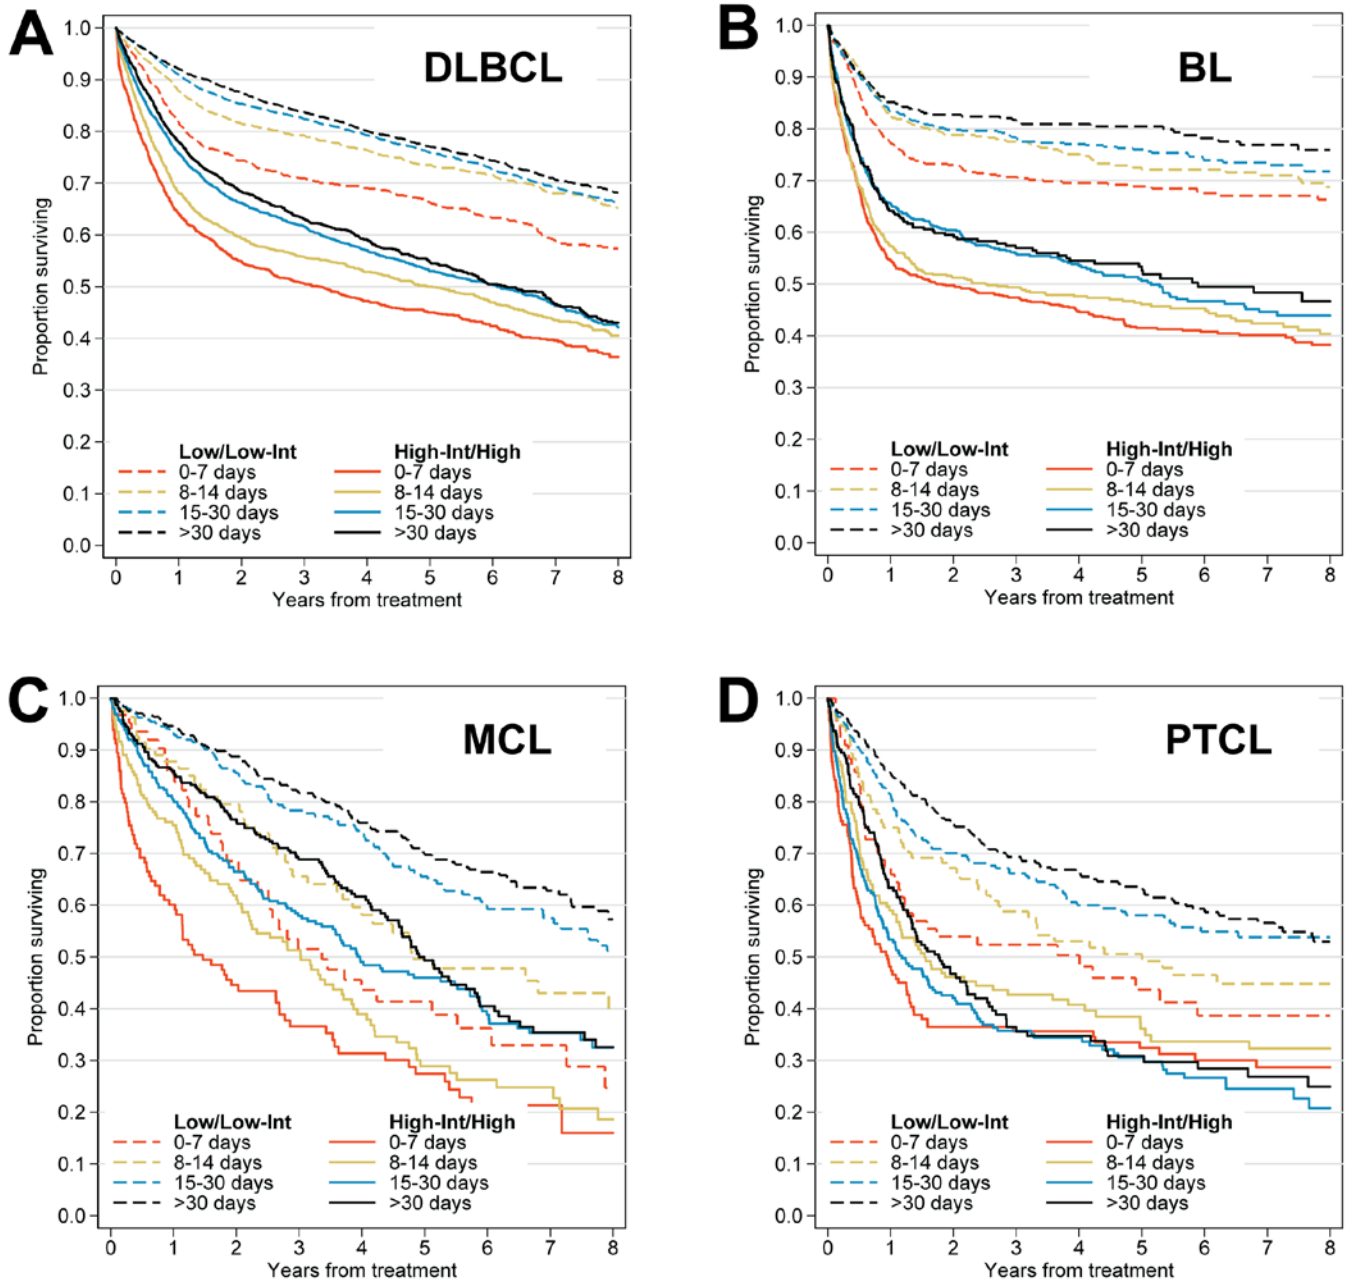

Supplement: NIHMS946846-supplement-Supp_info.pdf [file NIHMS946846-supplement-Supp_info.pdf]
